# Supplementary material
Source: Springer Nature journal article supplement (https://www.springermedizin.de/resource/supplementary/12978_2012_164_MOESM2_ESM.pdf/9602988)

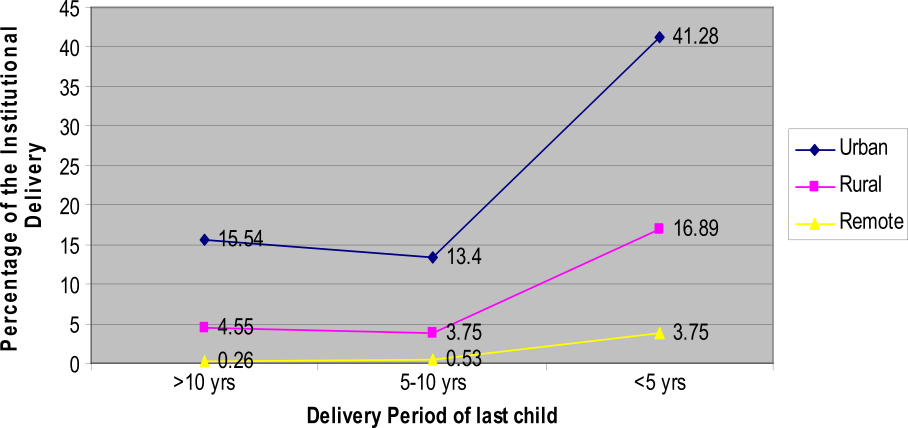

Supplement: MOESM2 [file 9602988]
